# Supplementary material
Source: publisher figshare collection journal article supplement (https://geolsoc.figshare.com/ndownloader/files/17838875)
Supplement: Supplementary file 1 [file 17838875]

## Sheet: Sheet1
Analysis name	Individual grain age (Ma)	Uncertainty (2 sigma)	Interpreted age (Ma)	Uncertainty (2 sigma)	δ18O	‰	ɛHf(t)	Uncertainty (2 sigma)
Jebel Akhdar
O14-04
04-02	735	11.7	775	21	7.89741	0.306935	7.98238	1.22809
04-10	800	13	775	21	9.90579	0.33303
04-13	769	12.7	775	21	8.23094	0.48358	5.80395	1.03156
04-12	789	13.58	775	21	6.56053	0.322251	6.18243	1.0413
04-20	740	12.34	775	21	7.87945	0.295922	6.00115	1.1892
04-22	750	12.88	775	21	6.36357	0.318463
04-27	697	12.98	775	21	7.83361	0.43652	6.88974	1.08091
04-30	852	14.79	852	15	8.26228	0.304771
04-01	750	11.48	775	21	9.5208	0.285998	6.28359	0.785968
04-07	734	11.67	775	21	7.8917	0.407138	6.22358	0.900287
O14-08
08-04	781	11.79	794	24	8.65067	0.334434	7.3374	0.967022
08-06	747	11.36	794	24	5.02779	0.284622
08-08	743	11.69	794	24	8.69872	0.352611	7.49256	1.23605
08-12	735	11.67	794	24	8.70372	0.311913	8.80146	1.25863
08-13	721	13.82	794	24	5.92898	0.300754	8.4767	1.11598
08-16	765	13.11	794	24	7.97928	0.333624
08-18	749	11.09	794	24	7.90253	0.337621	7.74431	1.20646
08-19	740	15.85	794	24	7.94524	0.29729
08-20	765	12.46	794	24	8.48018	0.367643	7.4522	1.66907
08-26	751	12.22	794	24	9.12361	0.294625
08-25	736	22.55	794	24	8.4377	0.300742	6.10835	1.16934
08-27	760	13.43	794	24	7.15992	0.362673	9.73569	1.22293
Al Jobah
AJ14-19
19-30	864	11.9	855	9	5.29727	0.380057	11.1782	1.21627
19-33	855	11.88	855	9	3.97636	0.418834	10.9905	0.83384
19-34	901	12.46	901	13	1.74937	0.304681	11.7474	0.679407
19-36	838	11.73	855	9	5.15346	0.288107	10.2051	0.85325
19-39	838	11.7	855	9	5.83256	0.335613	11.525	1.05212
19-56	837	11.82	855	9	6.0082	0.359655	10.161	0.81191
19-57	818	11.48	855	9	1.94188	0.423024	10.6981	0.857699
19-63	819	11.67	855	9	4.63553	1.37332	10.3735	1.00729
AJ14-25
25-04	847	11.87	861	13	5.67558	0.34069	9.29716	0.647318
25-10	823.9	11.55	861	13	4.98057	0.296774
25-13	842.3	12.61	861	13	5.61787	0.288924	9.87891	0.982875
25-16	904.4	12.3	904	12	4.89418	0.394574	11.3677	1.01608
25-17	833.3	12.07	861	13	4.03525	0.34907
25-20	835.1	12.01	861	13	5.77393	0.282407
25-29	882.8	13.71	861	13	4.16794	0.314069	10.1518	0.72206
25-27	829.6	12.95	861	13	5.26643	0.304734
Mirbat
MR15-01
MR-01-01	837	10.99	834	27	3.85332	0.429877	9.52722	0.917275
MR-01-02	825.8	10.93	834	27	4.65812	0.472187	8.43095	0.981422
MR-01-03	817.9	11.17	809	6	6.05784	0.407432	9.35603	0.981422
MR-01-04	799.9	13.1	809	6	3.60665	0.446067
MR-01-07	816.7	10.82	809	6	2.33529	0.660114	9.43559	0.77635
MR-01-12	802.5	10.32	809	6	2.358	0.462844	8.37629	0.781024
MR-01-13	832.2	19.37	834	27	2.69048	0.610815	9.5089	0.621927
MR-01-16	808.8	10.57	809	6	6.8915	0.496002
MR-01-18	808.8	10.57	809	6	2.39599	0.449267	7.86674	0.646469
MR-01-21	835.6	10.51	834	27	4.92836	0.409782
MR-01-22	812	11.6	809	6	2.17935	0.61077
MR-01-24	799.2	9.67	809	6	3.37666	0.441994
MR-01-25	804.5	10.54	809	6	2.34607	0.508539	8.07633	0.766736
MR-01-26	790.2	10.74	809	6	3.22918	0.459483
MR-01-33	799.3	11.26	809	6	2.47839	0.520768
MR-01-35	794.4	11.43	809	6	5.75585	0.403329
Mr15-02
MR-02-03	765.3	10.24	795	20	4.9237	0.426881
MR-02-04	804.6	11.37	795	20	3.0357	0.415942
MR-02-05	777.9	9.61	795	20	2.84154	0.409702
MR-02-06	801.7	10.57	795	20	2.01058	0.42841
MR-02-11	766.6	10.08	795	20	3.53772	0.417544	9.90092	0.905736
MR-02-12	791.9	10.25	795	20	3.79447	0.600193
MR-02-15	804.1	10.81	795	20	2.44543	0.448175
MR-02-16	760.8	10.23	795	20	2.45955	0.409019	9.28135	0.657475
MR-02-17	774.3	10	795	20	2.81304	0.42847
MR-02-19	794.9	12.42	795	20	3.38882	0.423163
MR-02-20	754.4	13.01	795	20	3.10591	0.418611
MR-02-24	808.6	10.76	795	20	4.45151	0.506106	9.9095	0.661161
MR-02-27	790.9	10.07	795	20	6.32212	0.520667
MR-02-28	776.2	11.22	795	20	4.98772	0.468278	9.82001	0.854558
MR-02-29	783.5	10.39	795	20	3.03227	0.412373
MR-02-30	774.7	14.27	795	20	2.42709	0.421024	10.3941	0.862647
MR-02-31	789.1	10.12	795	20	2.74489	0.410062
MR-02-33	774.1	17.76	795	20	4.05312	0.414347
MR-02-35	762.3	11.82	795	20	2.00814	0.449146	10.0377	0.75012
MR-02-37	784.3	9.9	795	20	3.87676	0.429194
MR-02-38	756.3	11.85	795	20	3.81504	0.426909	10.1569	0.937111
MR-02-40	814.2	11.75	795	20	2.24303	0.41954
MR-02-41	782.3	10.67	795	20	3.80592	0.426194
Mr15-04
MR-04-02	813.2	9.41	795	8	2.67752	0.432348
MR-04-03	763.4	9.22	795	8	4.77161	0.408676	10.7847	0.680501
MR-04-06	830.7	9.18	840	11	6.23451	0.436253	8.65207	0.85644
MR-04-07	836.8	9.83	840	11	2.47809	0.416961
MR-04-08	778.6	9.13	795	8	3.08841	0.44087
MR-04-10	811.3	9.35	795	8	2.67324	0.46933
MR-04-14	720.6	10.18	795	8	4.41433	0.404293
MR-04-16	803.4	11.21	795	8	1.88082	0.46531
MR-04-17	773.4	9.97	795	8	3.95013	0.412926
MR-04-18	777.5	10.69	795	8	3.85921	0.420148	9.65608	0.858616
MR-04-22	805.2	8.87	795	8	6.24699	0.488259
MR-04-28	788.8	14.64	795	8	4.31482	0.416172	10.4806	0.911098
MR-04-34	794.1	12.46	795	8	4.64059	0.516584
Mr15-05
MR-05-01	789.4	8.67	765	5	4.83433	0.422675
MR-05-02	770.8	9.7	765	5	4.32107	0.405781
MR-05-03	772.7	9.89	765	5	4.06496	0.446468
MR-05-05	765	9.26	765	5	4.57843	0.46639	8.94273	0.985393
MR-05-06	763.5	9.93	765	5	5.67655	0.416374	9.15912	0.65134
MR-05-07	769.7	9.42	765	5	4.7431	0.410007	8.88873	0.666633
MR-05-08	771.6	9.48	765	5	3.98417	0.409822	8.67016	0.548224
MR-05-11	770.9	9.84	765	5	5.34991	0.423297	9.13972	0.574818
MR-05-12	751.5	11.97	765	5	6.03531	0.532626	9.21888	0.703163
MR-05-13	787.2	10.86	765	5	4.42354	0.512247
MR-05-14	758.7	10.85	765	5	5.06265	0.416857	8.22266	0.729023
MR-05-15	754.6	10.94	765	5	6.4527	0.462478
MR-05-16	751.5	9.51	765	5	6.23643	0.50638
MR-05-17	761.7	9.15	765	5	4.14562	0.409839	9.27716	0.637071
MR-05-18	765.4	8.82	765	5	4.86444	0.46412	8.08289	0.745895
MR-05-19	751.5	9.63	765	5	6.03114	0.407713
MR-05-22	779.1	8.53	765	5	4.64228	0.414869
MR-05-23	748.3	9.47	765	5	3.51758	0.426047
MR-05-24	750.5	9.94	765	5	6.35106	0.469726
MR-05-25	763.3	8.34	765	5	4.27092	0.41442
MR-05-26	758.9	13.63	765	5	4.43935	0.413247
MR-05-27	737.6	7.97	765	5	3.51918	0.506747
MR-05-29	738.8	10.25	765	5	4.80182	0.432836
MR-05-30	791.5	12.74	765	5	4.19753	0.425503
MR-05-32	765.1	8.87	765	5	4.04238	0.817263
MR-05-33	761.2	9.83	765	5	4.64291	0.409586
MR-05-34	774.6	11.78	765	5	4.81102	0.536979
MR-05-35	768.2	10.21	765	5	4.6312	0.436597
Mr15-07
MR-07-02	872.6	9.89	850	9	2.19563	0.424633
MR-07-04	860.2	10.86	850	9	2.91682	0.410415
MR-07-05	858.3	9.54	850	9	4.33823	0.427585	11.5585	1.14026
MR-07-06	854.8	9.49	850	9	3.90122	0.455826	12.0037	0.768683
MR-07-11	833.2	9.69	850	9	3.43798	0.430468	11.0703	0.757658
MR-07-12	831.1	9.44	850	9	5.8878	0.485013	11.4115	1.2446
MR-07-13	828.7	10.44	850	9	3.47657	0.409404
MR-07-16	816.1	8.9	850	9	4.96363	0.52174	10.6812	1.06178
MR-07-18	813.2	8.98	850	9	2.71196	0.405783	10.5206	0.650367
MR-07-19	812.7	9.14	850	9	3.71483	0.406578	10.0887	0.85627
MR-07-22	843	8.98	850	9	2.35221	0.402577	10.8874	0.733926
MR-07-23	997	11	850	9	2.54226	0.402093	15.1892	0.77931
MR-07-24	805.8	10.84	850	9	4.20223	0.409197	11.4567	0.874243
MR-07-29	801.4	8.72	850	9	4.69397	0.433144
MR-07-30	797.6	8.96	850	9	2.31966	0.451826
MR-07-31	796.8	10.29	850	9	3.68809	0.416228
MR-07-32	795.4	8.47	850	9	2.84014	0.415373	10.6884	1.09225
MR-07-36	786	8.56	850	9	3.75798	0.441496	12.6587	0.78688
